# Supplementary material
Source: PubMed Central journal article supplement (PMC5063026)
Supplement: NIHMS819483-supplement-4.pdf [file NIHMS819483-supplement-4.pdf]

| GOTERM | Term                                           | Overlap | P-value  | Adjusted P Z-score | Combined S | Genes     |                                                                                                                                                                                                                                                                                                                                                                                                                  |
|--------|------------------------------------------------|---------|----------|--------------------|------------|-----------|------------------------------------------------------------------------------------------------------------------------------------------------------------------------------------------------------------------------------------------------------------------------------------------------------------------------------------------------------------------------------------------------------------------|
| GOTERM | tube development                               | 38/164  | 1.39E-06 | 0.000311           | -2.28405   | 18.448159 | ROBO2;TSHZ3;ITGB4;SIX1;PCSK5;SLC8A1;GLI3;GLI2;HHEX;SALL1;BMPEP;HRH2;PLXNA2;ALX4;SLIT2;SMAD2;TCF7L2;SMAD1;TFAP2B;JAG1;OSR1;WNT5A;COBL;PROX1;TBX18;POU3F3;SMAD7;SFRP1;DAB1;CPS1;PAX8;WT1;ALDH1A2;RARB;ITGA6;SPRY1;SIM1;FGFR2                                                                                                                                                                                       |
| GOTERM | cellular response to organic cyclic cc 55/291  |         | 2.06E-06 | 0.000427           | -2.4563    | 19.060371 | ITGB1;RZR2;MSTN;HNF4G;TNC;RORA;ROB;PARK2;SLC8A1;GLI2;NR3C2;TRIM24;ACVR1;BCAS3;PLA2G4F;MEF2C;ANXA1;MSX2;PDE4D;SSTR1;AXIN2;SSTR2;SPIDR;ISL1;GABRG2;ADCYAP1;SFRP1;NR5A2;CASQ2;RAPGEF2;RARB;ITGA6;AGTR2;RAPGEF3;AKAP6;ATP1A1;LRP8;LRP6;PGRMC2;ZNF703;SMAD1;MGMT;PTCH1;ESRRB;NR0B1;ESRRG;INHBA;NR2F2;KLF4;NR4A2;REST;BMP2;CPS1;WT1;NOX4                                                                               |
| GOTERM | regulation of epithelial cell prolifera 52/258 |         | 7.49E-07 | 0.000186           | -2.42351   | 20.82065  | SEMA5A;NRP1;NRP2;IHH;PTPRM;PTPRK;CDC73;ROBO1;EDNRA;CDH3;MEF2C;FBXW7;OSR1;WNT5A;CASK;PAX6;PEX2;PRKCA;PROX1;CYP7B1;FOXP2;TGFB1;FOXP1;SFRP1;ALDH1A2;CDH13;PRKD1;SRSF6;INTU;MAGED1;REG3G;GATA3;THBS4;LRP6;PBLD;ZNF703;GPC3;WNT2;MAP2K5;TCF7L2;EYA1;ANGPT1;BCL11B;PTCH1;IGF1;NR2F2;MCC;TBX18;BMP2;NFIB;FGFR2;FGF10                                                                                                    |
| GOTERM | positive regulation of cell developm 67/358    |         | 2.2E-07  | 5.78E-05           | -2.40583   | 23.475848 | ITGB1;FOXA1;SEMA5A;ROBO2;NRP1;TENM3;TENM4;OTP;GLI3;ROBO1;GLI2;SALL1;VWC2L;EPHA4;MEF2C;CDKL5;SEMA6A;DCC;TCF12;WNT5A;RFX3;COBL;PAX6;AXIN2;PROX1;OLFM4;ADCYAP1;TIAM1;PAX8;IL1RAPL1;RARB;RAPGEF2;PRKD1;EPHA3;NLGN1;FOXG1;SHOX2;CXCR4;AKAP6;ASCL1;LRP8;NEUROD1;BRINP2;BRINP1;ZNF703;BNIP2;DMD;SLIT2;NKX6-1;BRINP3;BCL9L;SMAD2;SMAD1;NGFR;NEGR1;XRCC5;IRX3;NTRK3;PHOX2B;PTPRD;DAB2;BMP2;DAB1;CAPRIN1;VWC2;TCF4;NEUROG2 |
| GOTERM | <b>neuron migration</b>                        | 34/116  | 5.09E-08 | 1.75E-05           | -2.20399   | 24.143516 | BARHL2;TOP2B;NRP1;NRP2;SATB2;FOXG1;ARX;CXCR4;GATA3;ASCL1;GJA1;SOX1;CHL1;DNER;PITX2;MEF2C;CDKL5;SEMA6A;OLIG3;DCC;USP9X;NTRK3;PAX6;PEX2;NR2F2;PHOX2B;NR4A2;DAB1;RAPGEF2;FAT3;FGF13;MDGA1;NEUROG2;ASTN1                                                                                                                                                                                                             |
| GOTERM | positive regulation of neurogenesis 58/283     |         | 1.07E-07 | 3.39E-05           | -2.35295   | 24.213446 | ITGB1;ROBO2;FOXA1;SEMA5A;NRP1;TENM3;TENM4;OTP;GLI3;ROBO1;GLI2;SALL1;VWC2L;EPHA4;MEF2C;CDKL5;SEMA6A;DCC;TCF12;WNT5A;COBL;PAX6;PROX1;TIAM1;ADCYAP1;IL1RAPL1;RAPGEF2;RARB;PRKD1;EPHA3;NLGN1;FOXG1;SHOX2;CXCR4;ASCL1;LRP8;NEUROD1;BRINP2;BRINP1;BNIP2;DMD;SLIT2;NKX6-1;BRINP3;NGFR;SMAD1;NEGR1;XRCC5;IRX3;NTRK3;PHOX2B;PTPRD;BMP2;DAB1;CAPRIN1;VWC2;TCF4;NEUROG2                                                     |
| GOTERM | <b>neuron projection guidance</b>              | 69/367  | 1.25E-07 | 3.48E-05           | -2.3749    | 24.379364 | ITGB1;ROBO2;SEMA5A;NRP1;NRP2;TENM2;TRIO;YWHAB;PTPRM;GLI3;ROBO1;GLI2;RPS6KA3;ALCAM;OPHN1;CHL1;TNR;ITGAV;NEO1;SH3GL2;EPHA5;EPHA4;EPHA7;SEMA6A;DCC;TRPC4;SEMA6D;WNT5A;RHOG;PAX6;GFRA1;TBR1;ETV1;UNC5D;RGMB;ISL1;RHOB;CREB1;ISPD;ROCK2;NRXN1;ARX;NRXN3;CXCR4;GATA3;EFNA5;ABLIM1;GBX2;PLXNA2;SLIT3;NCAM1;SLIT2;PLXNA4;PRNP;NGFR;BCL11B;CNTN6;ST8SIA2;AP2B1;POU4F3;EXT1;KLF7;NFASC;LHX2;KIF4B;NFIB;CNTN4;PVRL1;NEUROG2 |
| GOTERM | <b>axon guidance</b>                           | 69/367  | 1.25E-07 | 3.48E-05           | -2.37735   | 24.404511 | ITGB1;ROBO2;SEMA5A;NRP1;NRP2;TENM2;TRIO;YWHAB;PTPRM;GLI3;ROBO1;GLI2;RPS6KA3;ALCAM;OPHN1;CHL1;TNR;ITGAV;NEO1;SH3GL2;EPHA5;EPHA4;EPHA7;SEMA6A;DCC;TRPC4;SEMA6D;WNT5A;RHOG;PAX6;GFRA1;TBR1;ETV1;UNC5D;RGMB;ISL1;RHOB;CREB1;ISPD;ROCK2;NRXN1;ARX;NRXN3;CXCR4;GATA3;EFNA5;ABLIM1;GBX2;PLXNA2;SLIT3;NCAM1;SLIT2;PLXNA4;PRNP;NGFR;BCL11B;CNTN6;ST8SIA2;AP2B1;POU4F3;EXT1;KLF7;NFASC;LHX2;KIF4B;NFIB;CNTN4;PVRL1;NEUROG2 |

|        |                                       |        |          |          |          |           |                                                                                                                                                                                                                                                                                                                                                                                                                                                                      |
|--------|---------------------------------------|--------|----------|----------|----------|-----------|----------------------------------------------------------------------------------------------------------------------------------------------------------------------------------------------------------------------------------------------------------------------------------------------------------------------------------------------------------------------------------------------------------------------------------------------------------------------|
| GOTERM | neuron development                    | 35/121 | 4.28E-08 | 1.59E-05 | -2.24797 | 24.837429 | ROBO2;ALK;DGKG;ONECUT2;TENM4;IHH;RORB;PRDM1;ASCL1;HS6ST1;GLI2;SOX1;GBX2;SALL3;NPY;EPHA5;TFAP2A;GRXCR1;MEF2C;WNT5A;PBX3;EN1;PAX6;ETV1;PHOX2B;RUNX1;OLFM3;WNK1;GNAQ;HAND2;RAPGEF2;HOXD9;FGFR2;NEUROG2;LHX8                                                                                                                                                                                                                                                             |
| GOTERM | positive regulation of neuron differ  | 50/217 | 3.67E-08 | 1.49E-05 | -2.27268 | 25.259412 | FOXA1;ITGB1;ROBO2;SEMA5A;NRP1;TENM3;ROBO1;GLI2;SALL1;VWC2L;EPHA4;MEF2C;CDKL5;DCC;TCF12;WNT5A;COBL;PROX1;TIAM1;ADCYAP1;IL1RAPL1;RAPGEF2;RARB;PRKD1;EPHA3;NLGN1;SHOX2;ASCL1;LRP8;NEUROD1;BRINP2;BRINP1;BNIP2;DMD;SLIT2;NKX6-1;BRINP3;NGFR;SMAD1;NEGR1;IRX3;NTRK3;PHOX2B;PTPRD;BMP2;DAB1;CAPRIN1;VWC2;TCF4;NEUROG2                                                                                                                                                      |
| GOTERM | homophilic cell adhesion via plasma   | 40/142 | 8.81E-09 | 4.91E-06 | -2.18821 | 26.74848  | ROBO2;ITGB1;PTPRT;TENM3;CLSTN2;PCDH10;PTPRM;CDH9;PCDH18;CDH8;PCDH17;CDH7;ROBO1;CDH6;CDH5;CDH4;CDH3;CDH2;CDH20;CDH22;CDH23;PCDH1;CADM1;PCDH9;PCDH20;PCDH7;PCDH8;CDH10;CDH11;CDHR3;CDH12;CDH13;FAT3;IGSF9B;DSCAML1;FREM2;PVRL1;CDH18;DSC3;CDH19                                                                                                                                                                                                                        |
| GOTERM | neuron differentiation                | 52/222 | 1.23E-08 | 5.5E-06  | -2.30313 | 27.892437 | BTG4;BARHL2;RORA;OTP;RORB;SALL1;PSD3;PITX2;SOX5;EOMES;EMX2;MEF2C;GRID2;WNT5A;PAX3;UNC5D;PROX1;POU3F2;ISL1;POU3F4;HAND2;ALDH1A2;IL1RAPL1;NRXN1;ASCL1;LRP6;NEUROD1;ERBB4;FGF20;S1PR1;WNT2;FZD1;GRXCR1;JAG1;SKOR2;BCL11B;NTRK3;PTCH1;STAT3;UNCX;FZD8;SMARCA1;USH2A;PHOX2B;POU4F3;NR4A2;PTPRD;ID4;LHX5;MDGA2;MDGA1;CBLN1                                                                                                                                                 |
| GOTERM | organ morphogenesis                   | 78/405 | 7.51E-09 | 4.79E-06 | -2.34912 | 28.774777 | ERRFI1;NRP1;EDA;TENM3;ONECUT2;ITGB4;HHIP;IHH;TNC;SIX1;HCCS;SLC8A1;GLI3;GLI2;CYP26B1;SIX4;HOXA3;PITX2;TLE3;TLE1;SEMA6A;FST;OSR1;PAX3;PAX6;AXIN2;TGFBF1;DCN;MYCN;MMP16;HAND2;ALDH1A2;RARB;ITGA6;DSCAML1;SLC24A4;DLX2;TSHZ3;COL11A1;SATB2;ANKRD11;SHOX2;LRP4;ZNF22;PRKX;TTN;LRP6;NEUROD1;ABLIM1;PDGFC;ALX4;SLIT3;CTNNA2;NKX6-1;SMAD2;TFAP2A;TCF7L2;GRXCR1;WVVOX;PRRX1;EYA1;CDX2;BCL11B;PTCH1;INHBA;PBX1;TBX3;FLI1;TBX15;BMP2;DLC1;SP3;ASXL2;BCOR;HOXD9;FGFR2;LHX8;FGF10 |
| GOTERM | positive regulation of nervous system | 65/313 | 1.17E-08 | 5.5E-06  | -2.39821 | 29.043953 | ITGB1;ROBO2;FOXA1;SEMA5A;NRP1;TENM3;TENM4;OTP;GLI3;ROBO1;GLI2;SALL1;VWC2L;EPHA4;MEF2C;SEMA6A;CDKL5;DCC;TCF12;WNT5A;COBL;PAX6;PROX1;TIAM1;ADCYAP1;PARD3;IL1RAPL1;RAPGEF2;RARB;PRKD1;EPHA3;NLGN1;NRXN1;FOXG1;SHOX2;NRXN3;CXCR4;ASCL1;LRP8;NEUROD1;BRINP2;BRINP1;BNIP2;DMD;SLIT2;NKX6-1;ASIC2;BRINP3;NGFR;SMAD1;NEGR1;XRCC5;IRX3;NTRK3;IGF1;PHOX2B;PTPRD;BMP2;DAB1;CAPRIN1;VWC2;TCF4;CBLN2;NEUROG2;CBLN1                                                                |
| GOTERM | cell-cell adhesion via plasma-memb    | 51/190 | 3.4E-10  | 2.95E-07 | -2.20075 | 33.089628 | ROBO2;ITGB1;PTPRT;TENM2;TENM3;CLSTN2;PTPRM;CDH9;CDH8;CDH7;ROBO1;CDH6;CDH5;CDH4;CDH3;CDH2;GRID2;ITGA4;CDH10;CLDN12;IL1RAPL1;CDH11;CDHR3;CDH12;CLDN18;CDH13;DSCAML1;FREM2;CDH18;DSC3;CDH19;NLGN1;PCDH10;NRXN1;PCDH18;PCDH17;CDH20;CDH22;CDH23;PCDH1;CADM1;PCDH9;PCDH20;PCDH7;PCDH8;PTPRD;DAB1;FAT3;IGSF9B;PVRL1;CBLN1                                                                                                                                                  |
| GOTERM | cell-cell adhesion                    | 51/191 | 3.97E-10 | 2.95E-07 | -2.20258 | 33.117118 | ROBO2;PTPRT;ITGB1;TENM2;TENM3;CLSTN2;PTPRM;CDH9;CDH8;CDH7;ROBO1;CDH6;CDH5;CDH4;CDH3;CDH2;GRID2;ITGA4;CDH10;CLDN12;CDH11;IL1RAPL1;CDHR3;CDH12;CLDN18;CDH13;DSCAML1;FREM2;CDH18;DSC3;CDH19;NLGN1;PCDH10;NRXN1;PCDH18;PCDH17;CDH20;CDH22;CDH23;PCDH1;CADM1;PCDH9;PCDH20;PCDH7;PCDH8;PTPRD;DAB1;FAT3;IGSF9B;PVRL1;CBLN1                                                                                                                                                  |

|          |                                         |        |           |           |            |            |                                                                                                                                                                                                                                                                                                                                                                                                                                                                                                                                                |
|----------|-----------------------------------------|--------|-----------|-----------|------------|------------|------------------------------------------------------------------------------------------------------------------------------------------------------------------------------------------------------------------------------------------------------------------------------------------------------------------------------------------------------------------------------------------------------------------------------------------------------------------------------------------------------------------------------------------------|
| GOTERM   | regionalization                         | 60/247 | 2.8E-10   | 2.95E-07  | -2.40318   | 36.133242  | FOXA1;PGAP1;HHIP;RBPJ;PCSK5;GLI3;GLI2;CYP26B1;HHEX;ZIC3;HOXA3;EOMES;MEF2C;EMX2;MSX2;OSR1;WNT5A;EN1;PAX3;TBR1;PAX6;AXIN2;ISL1;DUSP6;TGFB1;PAX1;ZEB2;PAX8;ALDH1A2;DSCAML1;DLX2;INTU;FOXG1;LRP4;MLLT3;TTN;LRP6;NEUROD1;ARL13B;PLXNA2;ALX4;IRX1;SMAD2;IRX2;FOXB1;CDX2;PTCH1;ZBTB16;PCDH8;PBX3;NR2F2;TBX3;TBX18;ACVR2A;PBX1;BMP2;MAFB;LHX2;WT1;HOXD9                                                                                                                                                                                                |
| GOTERM   | embryonic morphogenesis                 | 82/403 | 3.25E-10  | 2.95E-07  | -2.42711   | 36.492981  | RYR2;TENM4;IHH;SIX1;SOBP;AFF3;GLI3;GLI2;CYP26B1;GJA1;HHEX;SALL1;SIX4;ZIC3;TBX1;TGFB1;POU3F4;SFRP1;MYCN;MMP16;PAX8;PPAP2B;HAND2;ALDH1A2;RARB;DSCAML1;DLX2;INSIG2;COL11A1;SATB2;FOXG1;SHOX2;LRP4;GATA3;LRP6;NEUROD1;ARL13B;GBX2;SLITRK6;GPC3;ALX4;LRIG3;SMAD2;TFAP2A;TCF7L2;PRRX1;EYA1;ZBTB16;PTCH1;ESRRB;EYA4;PCDH8;TBX5;TBX18;ACVR2A;PBX1;TBX3;POU4F3;EXT1;TBX15;MAFB;GNAQ;SP3;GJB5;ASXL2;SPRY2;HOXD9;KIAA1715;FGFR2;FGF10                                                                                                                     |
| GOTERM   | regulation of neuron differentiation    | 86/405 | 1.79E-11  | 4E-08     | -2.38803   | 40.677742  | ITGB1;SEMA5A;FOXA1;ROBO2;NRP1;APP;BARHL2;TENM3;ULK4;SIX1;GLI3;ROBO1;GLI2;PTPRG;SALL1;VWC2L;TNR;SOX5;EOMES;EPHA4;GRID2;MEF2C;ZHX2;CDKL5;DCC;TCF12;WNT5A;COBL;TBR1;PAX6;PROX1;POU3F2;ISL1;ADCYAP1;TIAM1;IL1RAPL1;RARB;RAPGEF2;PRKD1;TNIK;EPHA3;NLGN1;FOXG1;SHOX2;LRP4;GATA3;ASCL1;LRP8;NEUROD1;BRINP2;BRINP1;BNIP2;DMD;SLIT2;LRRC4C;NKX6-1;BRINP3;PLXNA4;TFAP2A;SMAD1;NGFR;ZFHX3;JAG1;SKOR2;EYA1;NEGR1;BCL11B;IRX3;NTRK3;PHOX2B;PBX1;PTPRD;BMP2;REST;MEIS1;DAB1;CAPRIN1;NEDD4;VWC2;ID4;ZNF536;TCF4;FAT3;CNTN4;FGF13;NEUROG2                      |
| GOTERM   | pattern specification process           | 94/385 | 1.61E-15  | 7.17E-12  | -2.37962   | 61.062597  | SEMA5A;FOXA1;NRP1;GALNT11;PGAP1;HHIP;IHH;SIX1;MEOX2;RBPJ;PCSK5;GLI3;GLI2;EDNRA;CYP26B1;HHEX;ZIC3;ZIC1;HOXA3;PITX2;EOMES;ACVR1;EMX2;MEF2C;MSX2;OSR1;FST;WNT5A;EN1;COBL;PAX3;TBR1;PAX6;AXIN2;MID1;ISL1;DUSP6;TGFB1;PAX1;ZEB2;SFRP1;PAX8;NRG3;ALDH1A2;DSCAML1;DLX2;INTU;DNAH5;SATB2;FOXG1;CXCR4;LRP4;MLLT3;CXXC4;TTN;LRP6;NEUROD1;ARL13B;GBX2;ERBB4;PLXNA2;GPC3;ALX4;IRX1;SMAD2;TFAP2A;IRX2;SMAD1;FOXB1;DNAH11;EYA1;CDX2;IRX3;ZBTB16;PTCH1;IRX4;PCDH8;PBX3;UNCX;NR2F2;TBX5;TBX18;ACVR2A;PBX1;TBX3;BMP2;MAFB;LHX2;WT1;BCOR;MDGA2;HOXD9;FGFR2;FGF10 |
| KEGG_PAT | neuroactive ligand receptor interaction | 39/238 | 0.0006900 | 0.0449161 | -1.9131685 | 5.93648127 | CHRM2;PTGER4;GRIK3;GRIK4;GRIK1;ADRB2;GRIK2;HTR2A;ADRA1A;RXFP2;MC4R;EDNRA;GRIN2A;HTR7;GRM7;HRH2;GRM8;PRLHR;GPR156;GRIA3;GABRA2;GRID2;P2RY10;HTR1E;GRID1;HTR1F;GLP2R;HTR1B;NMBR;SSTR1;SSTR2;GRIN2B;ADRA2A;GABRG2;GRIN3A;FSHR;PARD3;AGTR1;AGTR2                                                                                                                                                                                                                                                                                                   |
| KEGG_PAT | axon guidance                           | 25/126 | 0.0006406 | 0.0449161 | -1.8977006 | 5.88848480 | ITGB1;ROBO2;SEMA5A;NRP1;ROCK2;CXCR4;EFNA5;ROBO1;PPP3CA;ABLIM1;PPP3CB;RGS3;PLXNA2;SLIT3;SLIT2;LRRC4C;EPHA5;EPHA4;EPHA7;EPHA6;SEMA6A;DCC;SEMA6D;UNC5D;EPHA3                                                                                                                                                                                                                                                                                                                                                                                      |
| KEGG_PAT | cell adhesion molecules                 | 25/133 | 0.0012652 | 0.0449161 | -1.7058527 | 5.29318911 | ITGB1;CNTNAP2;NLGN1;NRXN1;NRXN3;PTPRM;CDH5;CDH4;ALCAM;CDH3;CDH2;ITGB8;ITGAV;NCAM1;NCAM2;ICOS;NEO1;CADM1;ITGA4;NEGR1;HLA-C;NFASC;CLDN18;ITGA6;PVRL1                                                                                                                                                                                                                                                                                                                                                                                             |
| KEGG_PAT | heparan sulfate biosynthesis            | 8/19   | 0.0012119 | 0.0449161 | -1.2988822 | 4.03037686 | EXT1;NDST4;NDST3;HS3ST5;HS6ST1;HS3ST1;HS6ST2;HS6ST3                                                                                                                                                                                                                                                                                                                                                                                                                                                                                            |
